CORRECTION

# Correction: Universality of Citation Distributions for Academic Institutions and Journals

The *PLOS ONE* staff

Figs [1](#), [2](#) and [3](#) are incorrect. The x and y axes of each figure are mislabeled. The publisher apologizes for the error. The authors have provided a corrected version here.

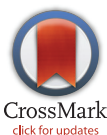

---

 OPEN ACCESS

**Citation:** The *PLOS ONE* staff (2016) Correction: Universality of Citation Distributions for Academic Institutions and Journals. *PLoS ONE* 11(2): e0148863. doi:10.1371/journal.pone.0148863

**Published:** February 5, 2016

**Copyright:** © 2016 The PLOS ONE staff. This is an open access article distributed under the terms of the [Creative Commons Attribution License](#), which permits unrestricted use, distribution, and reproduction in any medium, provided the original author and source are credited.

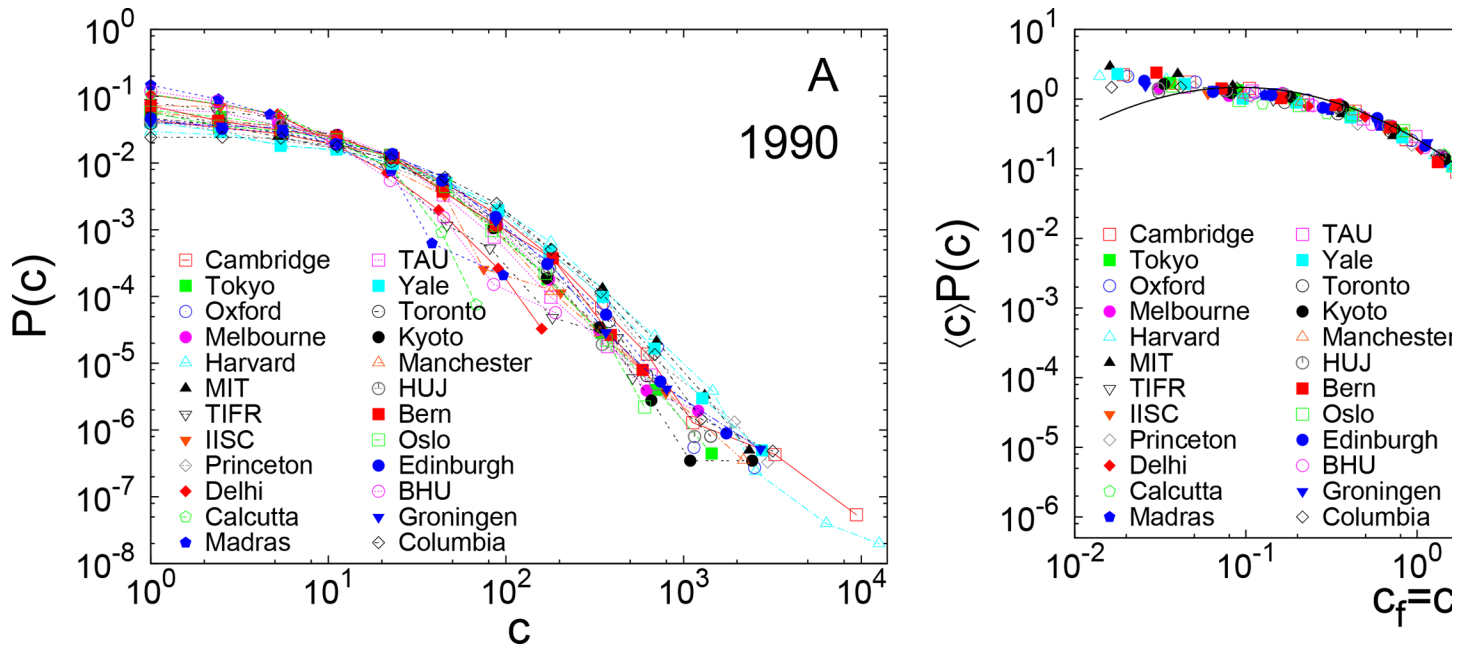

**Fig 1. Probability distribution of citation for academic institutions for 1990 (unscaled and rescaled).** (A) Probability distribution  $P(c)$  of citations  $c$  to publications from 1990 for several academic institutions. (B) The same data rescaled by average number of citations  $\langle c \rangle$ . The data for different institutions seem to follow the same scaling function. It fits very well to a lognormal function for most of its range, with  $\mu = -0.73 \pm 0.02$ ,  $\sigma = 1.29 \pm 0.02$ . The largest citations do not follow the lognormal behavior, and seem to follow a power law:  $c^{-\alpha}$ , with  $\alpha = 2.8 \pm 0.2$ .

doi:10.1371/journal.pone.0148863.g001

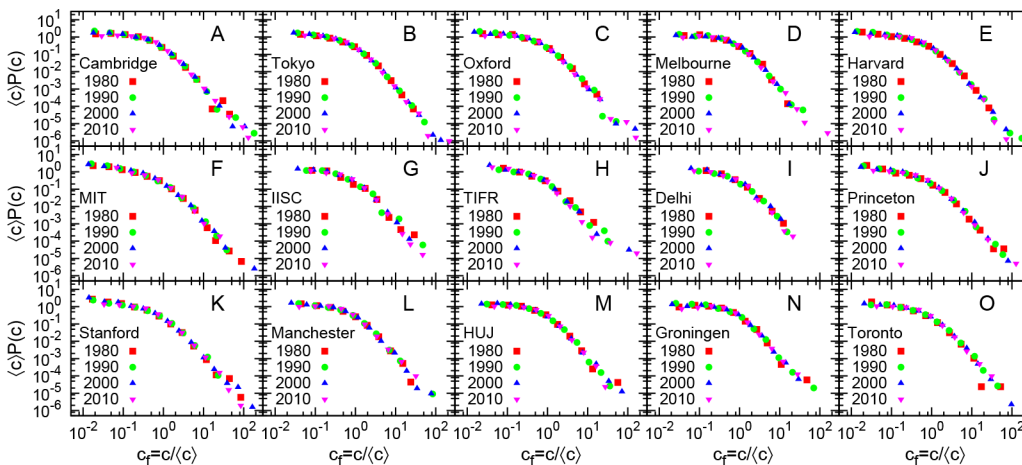

**Fig 2. Rescaled probability distributions of citation for several academic institutions for different years.** Probability distribution  $P(c)$  of citations  $c$  rescaled by average number of citations  $\langle c \rangle$  to publications from 4 different years (1980, 1990, 2000, 2010) for several academic institutions. For any institution, the data for different years seem to follow the same distribution.

doi:10.1371/journal.pone.0148863.g002

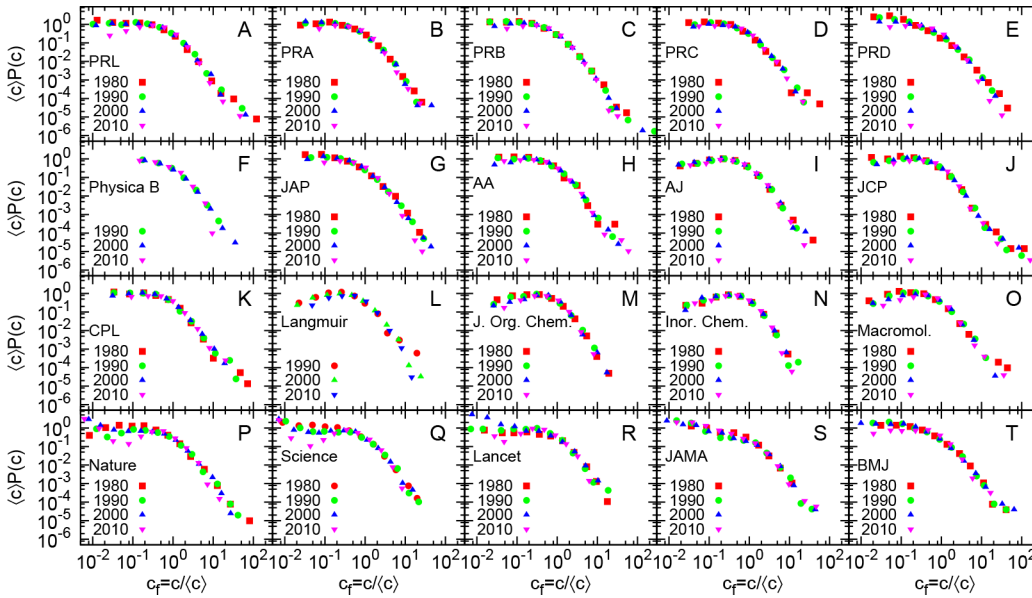

**Fig 3. Rescaled probability distributions of citation for academic journals for different years.** Probability distribution  $P(c)$  of citations  $c$  rescaled by average number of citations  $\langle c \rangle$  to publications from from 4 different years (1980, 1990, 2000, 2010) for several academic journal. For any journal, the data for different years seem to follow the same distribution.

doi:10.1371/journal.pone.0148863.g003

## Reference

1. Chatterjee A, Ghosh A, Chakrabarti BK (2016) Universality of Citation Distributions for Academic Institutions and Journals. PLoS ONE 11(1): e0146762. doi:[10.1371/journal.pone.0146762](https://doi.org/10.1371/journal.pone.0146762) PMID: [26751563](https://pubmed.ncbi.nlm.nih.gov/26751563/)
